# Supplementary material for: Alternative Pre-mRNA Splicing in Mammals and Teleost Fish: A Effective Strategy for the Regulation of Immune Responses Against Pathogen Infection
Source: PubMed Central journal article supplement (PMC5536018; doi:10.3390/ijms18071530), 2017-07-15
Supplement: ijms-18-01530-s001.pdf [file ijms-18-01530-s001.pdf]

Figure S1: Multiple alignment of the nucleotide sequences of zebrafish IRF3a, IRF3b and IRF3c. Identical residues are identified by stars, whereas similar residues are identified by single dots.

```

IRF3a      ATTGTTTCATTGTTATTTTTTAATGTAGCCAATAAACAAATAAATCTTATTTTAAAGTGCT
IRF3b      -----
IRF3c      -----

IRF3a      AAATAAACACAGCAGGCCTGACACACAGAAAACACATTTTAAATCGTCTGTTGTTTACG
IRF3b      -----
IRF3c      -----

IRF3a      TTCTTTTTTAATGGTCGTCTCCGCCATCTTGTGGTCATGCAGGGTAAAATAACTTACGGT
IRF3b      -----
IRF3c      -----

IRF3a      GACGTGTGTAATGACGCGAAAAGGGGAAATCGAAACTGATATGGGTTTCCCGAGTAATGT
IRF3b      -----
IRF3c      -----

IRF3a      TTTAAACCTGATCGTAAAGCACAGTCTGCTGAATAAAGCTCAGTATTAAACAACATTGA
IRF3b      -----
IRF3c      -----

IRF3a      CAAGCAGTTCGTCTACTTACATCTCTTACATCTGAGGAAGAGCTCGCTGAAAACACAGC
IRF3b      -----
IRF3c      -----

IRF3a      AGGCCCAAAACACTGTCGCTTCTGTTTGCAAGGTCCTGTCTATTGATGAATGTTGTGCT
IRF3b      -----
IRF3c      -----

IRF3a      GTATAGTCTGACTGCATCATGACTCAAGCAAAAACCGCTGTTTCGTGCCCTGGTTGTATGAA
IRF3b      -----ATGACTCAAGCAAAAACCGCTGTTTCGTGCCCTGGTTGTATGAA
IRF3c      -----ACCATGACTCAAGCAAAAACCGCTGTTTCGTGCCCTGGTTGTATGAA
                *****

IRF3a      CAAATCCAGAGTGGACGTTATCCTGGAGTATGCTGGAAAAATGAAGACTGTACCCAGTTC
IRF3b      CAAATCCAGAGTGGACGTTATCCTGGAGTATGCTGGAAAAATGAAGACTGTACCCAGTTC
IRF3c      CAAATCCAGAGTGGACGTTATCCTGGAGTATGCTGGAAAAATGAAGACTGTACCCAGTTC
                *****

IRF3a      AGCATTCCCTGGAAACACGCTTTGAGACAGGACTCCAACAGCGACGATGTGCTCATATTC
IRF3b      AGCATTCCCTGGAAACACGCTTTGAGACAGGACTCCAACAGCGACGATGTGCTCATATTC
IRF3c      AGCATTCCCTGGAAACACGCTTTGAGACAGGACTCCAACAGCGACGATGTGCTCATATTC
                *****

IRF3a      AAGGCGTGGGCTCAGACTAGCGCTGCTGGTGATGGCAGATTGAATGGAGATCCGTCTGTG
IRF3b      AAGGCGTGGGCTCAGACTAGCGCTGCTGGTGATGGCAGATTGAATGGAGATCCGTCTGTG
IRF3c      AAGGCGTGGGCTCAGACTAGCGCTGCTGGTGATGGCAGATTGAATGGAGATCCGTCTGTG
                *****

IRF3a      TGGAAGAGAAACTTTCGCAGTGTCTTTCGCGCTAAAGGCTTCAAATGATATCTGACAAA
IRF3b      TGGAAGAGAAACTTTCGCAGTGTCTTTCGCGCTAAAGGCTTCAAATGATATCTGACAAA
IRF3c      TGGAAGAGAAACTTTCGCAGTGTCTTTCGCGCTAAAGGCTTCAAATGATATCTGACAAA
                *****

IRF3a      AAGAATGATGGCGCCGATCCACATAAAGTCTATCAGTTTCCCTCCGATCCTCATCTGCA
IRF3b      AAGAATGATGGCGCCGATCCACATAAAGTCTATCAGTTTCCCTCCGATCCTCATCTGCA
IRF3c      AAGAATGATGGCGCCGATCCACATAAAGTCTATCAGTTTCCCTCCGATCCTCATCTGCA
                *****

IRF3a      GCTTCAGGATCTGAGGGCTCTCAAGAACTGAT-----
IRF3b      -----
IRF3c      GCTTCAGGATCTGAGGGCTCTCAAGAACTGATTGATACCGGTAATATCTGGAAAATTT

IRF3a      -----
IRF3b      -----
IRF3c      CCGGAACGACTTTACCGGTATATTA AAAAAGCGCTGTTCTCACAGGCGAGGACATTACGG

IRF3a      -----
IRF3b      -----
IRF3c      AAATTTCCGGAAAAGAGCATTACACATCCATTCCAAAATACCGGATTACTTTTCGCATG

IRF3a      -----
IRF3b      -----
IRF3c      TCGAGATGTTCAATATGTGCGTGTGCTGGCGCTCACAGGCTGTTTCAAAGGCACACGC

IRF3a      -----ATTTACCACATCTGTATGTGGATAATGTGTTACAGCATCATTGATT
IRF3b      -----
IRF3c      AAAGCTTAAAGATTTACCACATCTGTATGTGGATAATGTGTTACAGCATCCCTTGATT

```

IRF3a TGGACCAACATTTAACTGGACTACACCTCCAGGACCCATCAGCACGAGTCCATATCATT  
 IRF3b -----GTCCATATCATT  
 IRF3c TGGACCAACATTTTACTGGACTAAACCTTCAGGACCCATCAGCACACGCTATAGAATTT  
 \*\*\* \*\* \*

IRF3a TGAATCCAAATGACTTATATGTGGATCCAGGAACCCAGATATACGATTTTCAAGCAGTGG  
 IRF3b TGAATCCAAATGACTTATATGTGGATCCAGGAACCCAGATATACGATTTTCAAGCAGTGG  
 IRF3c TGAATCCAAATGACTTATATGTGGATCCAGGAACCCAGATATACGATTTTCAAGCAGTGG  
 \*\*\*\*\*

IRF3a TCCCTATTGAAGCCATATCCTCCTCAGATGAAGGTGCTGTCGGTGGTTTGGGACAGATTT  
 IRF3b TCCCTATTGAAGCCATATCCTCCTCAGATGAAGGTGCTGTCGGTGGTTTGGGACAGATTT  
 IRF3c TCCCTATTGAAGCCATATCCTCCTCAGATGAAGGTGCTGTCGGTGGTTTGGGAAAAATTT  
 \*\*\*\*\*

IRF3a CGCCAACTGAGGGAGCGATGGCTGTCAATCACATTTCTCGGGAATATCAACAGACTGCCA  
 IRF3b CGCCAACTGAGGGAGCGATGGCTGTCAATCACATTTCTCGGGAATATCAACAGACTGCCA  
 IRF3c CACCGACTGAGGGAGCGACAACGCAATCATAATTTCTCCAGAAATCAACAGACTGCCA  
 \* \*\* \*\*\*\*\* \*\* \*

IRF3a CTCAACCACATTTAGGAGCTGTACCTGATCACACTGCCATTCCTGAGCCAAATCTGGCGA  
 IRF3b CTCAACCACATTTAGGAGCTGTACCTGATCACACTGCCATTCCTGAGCCAAATCTGGCGA  
 IRF3c CTCAACCACATTTAGGAGCTGTAACTGATCACACTGCCATTCCTGAGCCAAATCTGGCGA  
 \*\*\*\*\*

IRF3a CATTTTTTCGGATCAAGGTTTATTATAAAGGGAAAAATGGTGATGGAGCAGTTGGTGGAGA  
 IRF3b CATTTTTTCGGATCAAGGTTTATTATAAAGGGAAAAATGGTGATGGAGCAGTTGGTGGAGA  
 IRF3c CATTTTTTCAGATCAAGGTTTATTACAGAGGGAAAAATGGTGATGGAGCAGTTGGTGGAGA  
 \*\*\*\*\*

IRF3a ACGACTCTGGTTTCAGACTGATGTACCACAGAAACATGGATGAGTCAGGCCTGCAGGATG  
 IRF3b ACGACTCTGGTTTCAGACTGATGTACCACAGAAACATGGATGAGTCAGGCCTGCAGGATG  
 IRF3c ACGACTCTGGTTTCAGACTGGTGTACCAC-----GAGTCAGGCCTGCAGGACA  
 \*\*\*\*\*

IRF3a GTGCGGGTCTCCAGTGGTCACTTCTCCTCCAGCTGAAGGAATGCCGGATCAAATGCAGA  
 IRF3b GTGCGGGTCTCCAGTGGTCACTTCTCCTCCAGCTGAAGGAATGCCGGATCAAATGCAGA  
 IRF3c GTGCGGGTCTCCAGTAGTCACTTCTCCTCCAGCTGAAGGAATACCGGATCAAGTGCAGA  
 \*\*\*\* \*\*\*\*\*

IRF3a CCAGGCTTACTAATGATATTCTGGATAATCTGGGTGGTCTGGAGATTCGGAGATCAGACG  
 IRF3b CCAGGCTTACTAATGATATTCTGGATAATCTGGGTGGTCTGGAGATTCGGAGATCAGACG  
 IRF3c CTGGGCATATAATAATATTCTGGATAACCTGGGTGGTCTGGAGATTCGGAGATCAGACG  
 \* \*\* \*\*\*\*\*

IRF3a GAGTGATTCACGGTCAACCGTTGGGGTCCAGCAGGATCTACTGGGGTCTGTGCAAGCATG  
 IRF3b GAGTGATTCACGGTCAACCGTTGGGGTCCAGCAGGATCTACTGGGGTCTGTGCAAGCATG  
 IRF3c GAGTGATTCACGGTCAACCGTTGGGGTCCAGCAAGATCTACTGGGGTCTGTGAAACATG  
 \*\*\*\*\*

IRF3a AAAGAAGCCAAACACCCAGAGAAGTGTCCAAAAACACACCTCAACCCATTTACCTCATGA  
 IRF3b AAAGAAGCCAAACACCCAGAGAAGTGTCCAAAAACACACCTCAACCCATTTACCTCATGA  
 IRF3c AAAGAAGCCAAACACCCAGAGAAGTGTCCAAAAACACACCTCAACCCATTTACCTCATGA  
 \*\*\*\*\*

IRF3a AAGATTACATTT-----  
 IRF3b AAGATTACATTTCAGTGGTAGGCCGGTCAATTTTTTGGCCGAGGTCGATCTCAATAAAC  
 IRF3c AAGATTACATTT-----  
 \*\*\*\*\*

IRF3a -----AGGTTTGTGTCAGTTTATTCAGACAGGAGGTG  
 IRF3b ATGGATGTCTGATGGTGTATCGTTCGTAGGTTTGTGTCAGTTTATTCAGACAGGAGGTG  
 IRF3c -----AGGTTTGTGTCAGTTTATTCAGACAGGAGGTG  
 \*\*\*\*\*

IRF3a AATCTCCTTCTTGCACTCTTACTTCTCCTGGGGGAGAAGTGGCCAGACCCATAAATGA  
 IRF3b AATCTCCTTCTTGCACTCTTACTTCTCCTGGGGGAGAAGTGGCCAGACCCATAAATGA  
 IRF3c AATCTCCTTCTTGCACTCTTACTTCTCCTGGGGGAGAAGTGGCCAGACCCATAAATGA  
 \*\*\*\*\*

IRF3a AGCCTTGGGAGAAGAACTCATCATGATTGAGGTTAATCTGACCGCACTGGAGTTTTTGA  
 IRF3b AGCCTTGGGAGAAGAACTCATCATGATTGAGGTTAATCTGACCGCACTGGAGTTTTTGA  
 IRF3c AGCCTTGGGAGAAGAACTCATCATGATTGAGGTTAATCTGACCGCACTGGAGTTTTTGA  
 \*\*\*\*\*

IRF3a AGTCTATGGCTGTTGAACAAGGAGCGTCTTCACTGCAGTCAGACGAGCTGCAGCTTTCCC  
 IRF3b AGTCTATGGCTGTTGAACAAGGAGCGTCTTCACTGCAGTCAGACGAGCTGCAGCTTTCCC  
 IRF3c AGTCTATGGCTGTTGAACAAGGAGCGTCTTCACTGCAGTCAGACGAGCTGCAGCTTTCCC  
 \*\*\*\*\*

IRF3a TGGAGCAAATGATGGAGCTCTGCTAAAAACAACCTCCTGGGTTAACCTGTTTACACTGTG  
 IRF3b TGGAGCAAATGATGGAGCTCTGCTAA-----  
 IRF3c TGGAGCAAATGATGGAGCTCTGCTG-----  
 \*\*\*\*\*

IRF3a GTCGTCGGATCCTCTTCTGATCTTTCTCCTCCATGGACAGATCTCTGAGCTCGGACAG

IRF3b -----  
IRF3c -----

IRF3a CCGCACCAGCAGACCCTCTTTATTCAGTCCCATCGGCTGAATCACATTATCCCTGTTTAA  
IRF3b -----  
IRF3c -----

IRF3a GAAAAACACAAGAAGGTTTGAGAACCTAACAAAGGATCCTTCTGGAAAACTGAAACAA  
IRF3b -----  
IRF3c -----

IRF3a TTGATTGA  
IRF3b -----  
IRF3c -----

Figure S2: Multiple alignment of the protein sequences of zebrafish IRF3a, IRF3b and IRF3c-1. Identical residues are identified by stars, whereas similar residues are identified by single dots.

```

IRF3a      MTQAKPLFVFWLYEQIQSGRYPGVCWKNEEDCTQFSIPWKHALRQDSNSDDVLI FKAWAQT
IRF3b      MTQAKPLFVFWLYEQIQSGRYPGVCWKNEEDCTQFSIPWKHALRQDSNSDDVLI FKAWAQT
IRF3c-1    MTQAKPLFVFWLYEQIQSGRYPGVCWKNEEDCTQFSIPWKHALRQDSNSDDVLI FKAWAQT
*****

IRF3a      SAAGDGRNLGDPVSWKRNFRSALRAKGFKMISDKKNDGADPHKVYQFPSPHSAASGSEG
IRF3b      SAAGDGRNLGDPVSWKRNFRSALRAKGFKMISDKKNDGADPHKVYQFPSPHSA-----
IRF3c-1    SAAGDGRNLGDPVSWKRNFRSALRAKGFKMISDKKNDGADPHKVYQFPSPHSAASGSEG
*****

IRF3a      SQETDISPHLYVDNVFTASFDLDQHLTGLHLQDPSARVHIILNPNLDLYVDPGTQIYDFQA
IRF3b      -----VHIILNPNLDLYVDPGTQIYDFQA
IRF3c-1    SQETD-----

IRF3a      VVPIEAISSSDEGAVGGLGQISPTEGAMAVNHISREYQQTATQPHLGAVPDHTAIPENL
IRF3b      VVPIEAISSSDEGAVGGLGQISPTEGAMAVNHISREYQQTATQPHLGAVPDHTAIPENL
IRF3c-1    -----

IRF3a      ATFFRIKVVYKGMVMEQLVENDSGFRLMYHRNMDESLQDGAGLPVVTLPPEAGMPDQM
IRF3b      ATFFRIKVVYKGMVMEQLVENDSGFRLMYHRNMDESLQDGAGLPVVTLPPEAGMPDQM
IRF3c-1    -----

IRF3a      QTRLTNDILDNLGGLEIRRSBGVIHGRWSSRIYWGLCKHERSQTPRELSKNTQPPIYL
IRF3b      QTRLTNDILDNLGGLEIRRSBGVIHGRWSSRIYWGLCKHERSQTPRELSKNTQPPIYL
IRF3c-1    -----

IRF3a      MKDYIS-----GLMQFIQTGGESPCTLYFFLGEKWPDPK
IRF3b      MKDYISGGRPVNFLAEVDLNKHGCLMVYRSVGLMQFIQTGGESPCTLYFFLGEKWPDPK
IRF3c-1    -----

IRF3a      MKPWEKKLIMIEVNLTALEFLKSMAVEQGASSLQSDLEQLSLEQMMELC
IRF3b      MKPWEKKLIMIEVNLTALEFLKSMAVEQGASSLQSDLEQLSLEQMMELC
IRF3c-1    -----

```

Figure S3: Multiple alignment of the protein sequences of zebrafish IRF3a, IRF3b and IRF3c-2. Identical residues are identified by stars, whereas similar residues are identified by single dots.

```

IRF3a      MTQAKPLFVFWLYEQIQSGRYPGVCWKNEEDCTQFSIPWKHALRQDSNSDDVLIKAWAQT
IRF3b      MTQAKPLFVFWLYEQIQSGRYPGVCWKNEEDCTQFSIPWKHALRQDSNSDDVLIKAWAQT
IRF3c-2    -----MFI-----IC-----
           :*          :*

IRF3a      SAAGDGRNLNGDPSVWKRNFRSALRAKGFKMI SDKKNDGADPHKVYQFPSPHSAASGSEG
IRF3b      SAAGDGRNLNGDPSVWKRNFRSALRAKGFKMI SDKKNDGADPHKVYQFP-----
IRF3c-2    ACAGAHRL-----FQRHTQSL-----
           :.* **      ::* .*

IRF3a      SQETDISPHLYVDNVFTASFDLDQHLTGLHLQDPSARVHI ILNPNDLYVDPGTQIYDFQA
IRF3b      -----SDPHSAVHI ILNPNDLYVDPGTQIYDFQA
IRF3c-2    ---KISPHLYVDNVFTASLDLDQHFTGLNLQDPSAHVYRILNPDDLYVDPGTQILDFQA
           .** : * : ** : *****

IRF3a      VVPIEAISSSDEGAVGGLGQISPTGAMAVNHI SREYQQTATQPHLGAVPDHTAIPEPNL
IRF3b      VVPIEAISSSDEGAVGGLGQISPTGAMAVNHI SREYQQTATQPHLGAVPDHTAIPEPNL
IRF3c-2    VVPIKAISSSDEGAVGGLGKISPTGATTANHNSPEYQQTATQPHLGAVTDHTAIPEPNL
           **** : ***** : ***** :.* * ***** : *****

IRF3a      ATFFRIKVYKGMVMEQLVENDSGFRLMYHRNMDSEGLQDGAGLPVVTLPPEAGMPDQM
IRF3b      ATFFRIKVYKGMVMEQLVENDSGFRLMYHRNMDSEGLQDGAGLPVVTLPPEAGMPDQM
IRF3c-2    ATFFQIKVYRGMVMEQLVENDSGFRLVYH---ESGLQDSAGLPVVTLPPEAGIPDQV
           **** .***** .***** :.* ***** .***** :.* :

IRF3a      QTRLNDILDNLGGLEIRRS DGVIHGHRWGSSRIYWGLCKHERSQTPRELSKNTQPPIYL
IRF3b      QTRLNDILDNLGGLEIRRS DGVIHGHRWGSSRIYWGLCKHERSQTPRELSKNTQPPIYL
IRF3c-2    QTGHTNNILDNLGGLEIRRS DGVIYGHWRGSSKIYWQCKHERSQTPRELSKNTQPPIYL
           ** ** :***** :***** .**** *****

IRF3a      MKDYIS-----GLMQFIQTGGESPCTLYFFLGEKWPDPK
IRF3b      MKDYISGGRPVNFLAEVDLNKHGCLMVYRSVGLMQFIQTGGESPCTLYFFLGEKWPDPK
IRF3c-2    MKDYIS-----GLMQFMQTGGESPCTLYFFLGEKWPDPK
           ***** ***** :*****

IRF3a      MKPWEKKLIMIEVNLTALEFLKSMAVEQGASSLQSDQLSLEQMMELC
IRF3b      MKPWEKKLIMIEVNLTALEFLKSMAVEQGASSLQSDQLSLEQMMELC
IRF3c-2    MKPWEKKLIMIEVNLTALEFLKSMAVEQGASSLQSDQLSLEQMMELC
           *****

```
